# Supplementary material for: A high HIV-1 strain variability in London, UK, revealed by full-genome analysis: Results from the ICONIC project
Source: PubMed Central journal article supplement (PMC5794160; doi:10.1371/journal.pone.0192081), 2018-02-01
Supplement: pone.0192081.s001.pdf [file pone.0192081.s001.pdf]

## Supporting Information for:

# A High HIV-1 Strain Variability in London, UK, Revealed by Full-Genome Analysis: Results from the ICONIC Project

Gonzalo Yebra<sup>1,\*</sup>, Dan Frampton<sup>2</sup>, Tiziano Gallo Cassarino<sup>2</sup>, Jade Raffle<sup>2,3</sup>, Jonathan Hubb<sup>4</sup>, R. Bridget Ferns<sup>3,5</sup>, Laura Waters<sup>6</sup>, William Tong<sup>4</sup>, Zisis Kozlakidis<sup>2,7</sup>, Andrew Hayward<sup>8</sup>, Paul Kellam<sup>9</sup>, Deenan Pillay<sup>2</sup>, Duncan Clark<sup>4,10</sup>, Eleni Nastouli<sup>3,11</sup> and Andrew J. Leigh Brown<sup>1</sup> on behalf of the ICONIC consortium<sup>^</sup>.

<sup>1</sup> Institute of Evolutionary Biology, University of Edinburgh, Edinburgh, UK

<sup>2</sup> UCL Division of Infection and Immunity, Faculty of Medical Sciences, London, UK

<sup>3</sup> Department of Clinical Virology, UCL Hospital NHS Foundation Trust, London, UK

<sup>4</sup> Department of Virology, Barts Health NHS Trust, London, UK

<sup>5</sup> NIHR UCLH/UCL Biomedical Research Centre, London, UK

<sup>6</sup> Department of HIV Medicine, Mortimer Market Centre, Central & North West London NHS Trust, London, UK

<sup>7</sup> Queen Mary University, London, UK

<sup>8</sup> UCL Institute of Disease Informatics, Farr Institute of Health Informatics Research, London, UK

<sup>9</sup> UCL Institute of Epidemiology and Health Care, London, UK

<sup>10</sup> Division of Infectious Diseases, Department of Medicine, Imperial College London, London, UK

<sup>11</sup> School of Life Sciences, University of Glasgow. Glasgow, UK

<sup>12</sup> Department of Population, Policy and Practice, UCL GOS Institute of Child Health, London, UK

\* Correspondence to GY (Gonzalo.Yebra@ed.ac.uk)

This file contents:

- Supporting Results (page 2).
- Fig A (page 5).
- Fig B (page 6).
- Fig C (page 7)
- Table A (page 9).
- Table B (page 18).

## Supporting Results

### Unique recombinant forms (URFs)

We provide here a detailed description for the recombination patterns of the HIV-1 Unique Recombinant Forms (URFs) not covered in the Main Text. For those URF presenting breakpoints in the PR+RT *pol* region, genetically similar *pol* sequences were searched within the UK HIV Drug Resistance database (UKHDRD).

**B/C.** We found 3 URF\_BC, of which two formed a transmission pair (MF109542 and MF109595, genome-wide similarity=97.1%) that involved common breakpoints –a subtype B fragment covering most of *gag-pol* in a subtype C background. The subtype B regions were genetically close to GenBank sequences sampled in the US and Germany (similarity=94%), whereas the subtype C *env* segment was close to the South African epidemics with the most similar sequences found through BLAST being sampled in Botswana (similarity=86%). The genome-wide genetic similarity between these two URF\_BC was 97.12%. For the third, unrelated URF\_BC found here (MF109486), the subtype C *env* fragment also presented high similarity with GenBank sequences from South Africa and Malawi (up to 87% of similarity), whereas the subtype B portion in *gag* was similar to GenBank sequences from Spain, the US and the UK (up to 94%).

**B/G/CRF02\_AG** (MF109355). This URF was classified as A1/B/G by jpHMM, but all subtype A1 and one subtype G segments (in *gag-pol*) belonged to CRF02\_AG; whereas the subtype G segments covering *vpu* and *nef* clustered with pure G reference sequences. Furthermore, many of these regions assigned to CRF02\_AG and the small subtype B region in *env* seemed to be closely related to CRF56\_cpx, a recombinant described among MSM subjects in France in 2013 [1]. However, the URF\_02BG reported here showed different breakpoints than those found in CRF56\_cpx (made up of B, G and CRF02\_AG as well) in the *env* gene. The lack of *pol* sequence prevents for a further and better study of the missing subtype B segments.

**B/CRF02\_AG.** We found 3 URF\_02B. In the first one (MF109397), subtype B represented most of the genome, whereas the *env* gene corresponded CRF02\_AG. The subtype B PR+RT *pol* segment presented high similarity with UK sequences from the UKHDRD (similarity=98%), whereas the closest GenBank sequences to the CRF02\_AG segment were from Cameroon and France (87%). In the second case (MF109508) only part of the *gag* gene belonged to CRF02\_AG with the rest of the genome corresponding to subtype B. The closest GenBank sequences to the CRF02\_AG parental (similarity=96%) were sampled in Nigeria. Finally, the last URF\_02B (MF109672) corresponded to subtype B in the integrase coding region (*pol*) within a CRF02\_AG genomic background. The PR+RT *pol* segment presented high similarity with CRF02\_AG GenBank and UKHDRD sequences from the UK (97%), which may suggest that the parental CRF02\_AG variant was circulating locally.

**B/F1/CRF02\_AG** (MF109637). The longest part of the genome corresponded to subtype F1, in which this sequence clustered very closely with two other pure subtype F1 sequences in the cohort (MF109526 and MF109434) (similarity in the concatenated, 5,679bp-long F1 segments=95.4% and 95.66% respectively). This fact would point to this F1 lineage (already circulating in the UK) as the parental F1 variant, and possibly an evidence that the recombination that generated this URF\_02BF1 took place in the UK. The closest GenBank sequences to these subtype F1 segments were from Brazil in both *gag* and *env* regions (similarity=92% and 88% respectively). For the subtype B *pol* region (1258bp) we could not find closely related sequences (maximum similarity within UKHDRD=94%), whereas both CRF02\_AG segments (in *pol* with 292bp and in *env* with 850bp) were very close to a “pure” CRF02\_AG sequence in our cohort (MF109500, similarity=98% and 94% in both segments respectively) and, to a lesser extent, to a GenBank lineage of sequences sampled predominantly in France (similarity=87%). The presence of putative parental F1 and CRF02\_AG lineages within our dataset could be evidence of a recombination event occurred at least in Western Europe. The PR+RT region, which covered two breakpoints (F1/CRF02\_AG/B), had 4 similar sequences (95%) in the UKHDRD, but the jpHMM analysis of them showed the same CRF02\_AG/B breakpoint but no subtype F1 region. The closest GenBank PR+RT sequences were CRF02\_AG from Burkina Faso, Senegal and Cameroon (93%) but corresponded to pure subtype G sequences.

**B/CRF01\_AE.** We found 4 URF\_01B in our dataset. Two of them represented a transmission pair of 2 URF\_01B (MF109404 and MF109516, genome-wide similarity=97.7%) which shared the same recombination breakpoints (although part of one of the sequences was missing). The sequence that covered the PR+RT *pol* region presented a CRF01\_AE/B breakpoint in it, which allowed identifying 4 highly similar (>99%) *pol* sequences in the UKHDRD with the same breakpoint according to jpHMM. The most similar GenBank CRF01\_AE sequences were from Thailand in *gag* (97%) and *env* (88%). The third URF\_01B (MF109614) presented only 2 short portions of subtype B in *pol* and *vpu*. Despite the fact that the breakpoint in *pol* was similar to one found in the URF\_01B transmission pair described above, they were not phylogenetically close. Again, we looked for similar sequences to the PR+RT region within the UKHDRD and discovered 4 similar (>96%) samples with the same recombination breakpoint. The last URF\_01B (MF109462) also had two, but different, subtype B segments in integrase (*pol*) and *vpr-tat*, being unrelated to the cases above in the phylogenetic analyses and without breakpoints in PR+RT.

**B/F1.** We found a pair of 2 URF\_BF1 (MF109665 and MF109674, genome-wide similarity=96.8%) which shared identical breakpoints. They were closely related to B/F1 recombinants from South America (e.g. Bolivia, Argentina, Brazil), particularly to CRF12\_BF and CRF17\_BF but they presented difference recombination breakpoints. We could not find highly similar sequences already circulating in the UK that could clarify whether the recombination events that generated these URF\_BF1 happened in the UK or abroad.

**A1/C.** We found 2 unrelated URF\_A1C with different recombination patterns. The first URF\_A1C (MF109562) presented a subtype A1 fragment in *gag* that was close to GenBank sequences from Kenya (similarity=94%), but the rest of the genome belonged to subtype C. The *pol* and *env* genes were similar to GenBank sequences from Mozambique and Malawi, respectively (similarity=97% and 86%). The second URF\_A1C detected (MF109587) was close to GenBank subtype C sequences from South Africa in *gag* (94%) whereas its putative subtype A1 *env* gene represented a divergent lineage that actually branched outside the subtype A1/A2 crown in the ML trees. A BLAST search of this 1379bp-long segment allowed to find two URF\_A1C sampled in Durban, South Africa (accession numbers AF411965 and DQ093606) that presented very similar recombination patterns and clustered together with the URF\_A1C reported here after including them in the phylogenetic trees. However, they did not present a particularly high genome-wide similarity (89.7% and 90.4% respectively).

**A1/C/D** (MF109445). The subtypes C and D segments of this URF\_A1CD were phylogenetically close to the recombinant CRF10\_CD described in Tanzania in 2001 [2]. Indeed, the closest GenBank sequences to this URF were from Eastern Africa: Kenya for the subtype D *gag* (similarity=92%), the subtype A1 *pol* (95%) and the subtype C *vpu-env* (86%), and Uganda for the subtype D *env* (87%). We found 3 highly similar (identity>98%) PR+RT sequences in the UKHDRD that shared the same recombination breakpoints.

**C/J** (MF109649). This URF\_CJ contains a small subtype J fragment roughly covering gp120 coding region (*env* gene), but most of the genome is subtype C. In the subtype J fragment, this URF clusters closely with CRF49\_cpx, a recombinant between subtypes A1, C, J and K that circulates in the Gambia [3]. However, it did not share breakpoints with that CRF.

**A1/G/J** (MF109629). Unlike the previous case, this URF's fragments belonging to subtypes A1, G and J did not correspond to an established CRF, but to pure parental variants. The subtype G segments covered most of the genome, and was close to GenBank sequences from Nigeria/Cameroon (similarity=92% in *gag*, 95% in *pol*, 84% in *env*). The A1 segments were close to GenBank sequences from Kenya and Rwanda (similarity=93% in *gag*-protease and 92% in *env*). The subtype J portions were relatively close to CRF09\_cpx, a recombinant described in West Africa but with a likely origin in Central Africa [4]. We could not find sequences that were close to the PR+RT *pol* region in either the UKHDRD or GenBank: the closest sequences had a low (<94%) similarity and were pure subtype G.

**D/G** (MF109700). The closest GenBank sequences to the subtype D *pol* segment (945bp long) were from Uganda and Kenya (similarity=95%). The subtype G segments presented high similarity to sequences from Uganda and Nigeria in *gag*, *pol* and *env* (similarity=92%, 94% and 86% respectively).

**A1/G/CRF01** (MF109686). The jpHMM analysis provided a recombination pattern that turned out to be more complex when SimPlot and Rega analyses provided, and which was eventually confirmed by ML trees of the recombinant fragments. Namely, this URF\_01AG presented extra breakpoints between CRF01\_AE and subtype A1 in regions (*gag* and *vif-vpr*) initially assigned only to the latter, obscured by the similarity between these two variants. Furthermore, some segments that were assigned to subtype A1 were relatively close to CRF02\_AG, although this variant was eventually ruled out as potential parental. The PR+RT *pol* region corresponded entirely to subtype G, and the closest GenBank sequences were from Central Africa (Democratic Republic of Congo and Cameroon, similarity=94%).

**G/CRF02\_AG**. We found 2 cases of recombination between CRF02\_AG and its parental strain, subtype G. Although CRF02\_AG originated in the early 1970s [5], it still shares a high similarity with subtype G in some genomic regions, which complicated the detection of breakpoints. In the first URF\_02G found (MF109402), most of the genome belonged to CRF02\_AG, whereas two fragments of the *env* gene were ascribed to subtype G. The closest GenBank sequences to the CRF02\_AG segments were sampled in Cameroon and Angola (similarity=94% in *pol*), whereas the two subtype G were similar to samples from Cameroon and Nigeria (similarity~87%). For the second URF\_02G (MF109644), CRF02\_AG was the parental variant for the whole *gag* region and fragments of *env*, with the rest of the sequence corresponding to subtype G, however, the *vif-vpr* region remained difficult to assign to either parental variants. The closest GenBank sequences to both CRF02\_AG and G segments were from Nigeria.

## References for Supporting Results

1. Leoz M, Feyertag F, Charpentier C, Delaugerre C, Wirden M, Lemee V, et al. Characterization of CRF56\_cpx, a new circulating B/CRF02/G recombinant form identified in MSM in France. *AIDS*. 2013; 27: 2309-12.
2. Koulinska IN, Ndung'u T, Mwakagile D, Msamanga G, Kagoma C, Fawzi W, et al. A new human immunodeficiency virus type 1 circulating recombinant form from Tanzania. *AIDS Res Hum Retroviruses*. 2001; 17: 423-31.
3. de Silva TI, Turner R, Hué S, Trikha R, van Tienen C, Onyango C, et al. HIV-1 subtype distribution in the Gambia and the significant presence of CRF49\_cpx, a novel circulating recombinant form. *Retrovirology*. 2010; 7: 82.
4. Delatorre E, Bello G. Time-scale of minor HIV-1 complex circulating recombinant forms from Central and West Africa. *BMC Evol Biol*. 2016; 16: 249.
5. Faria NR, Suchard MA, Abecasis A, Sousa JD, Ndembu N, Bonfim I, et al. Phylodynamics of the HIV-1 CRF02\_AG clade in Cameroon. *Infect Genet Evol*. 2012; 12: 453-60.

**Fig A.** Alignment of the 375 consensus HIV-1 ICONIC genome sequences. The diagram shows the HIV-1 genome map and HXB2 coordinates for the limits of the main genes. The arrows indicate the position of the primer sets used for amplification (see Methods section of the main text).

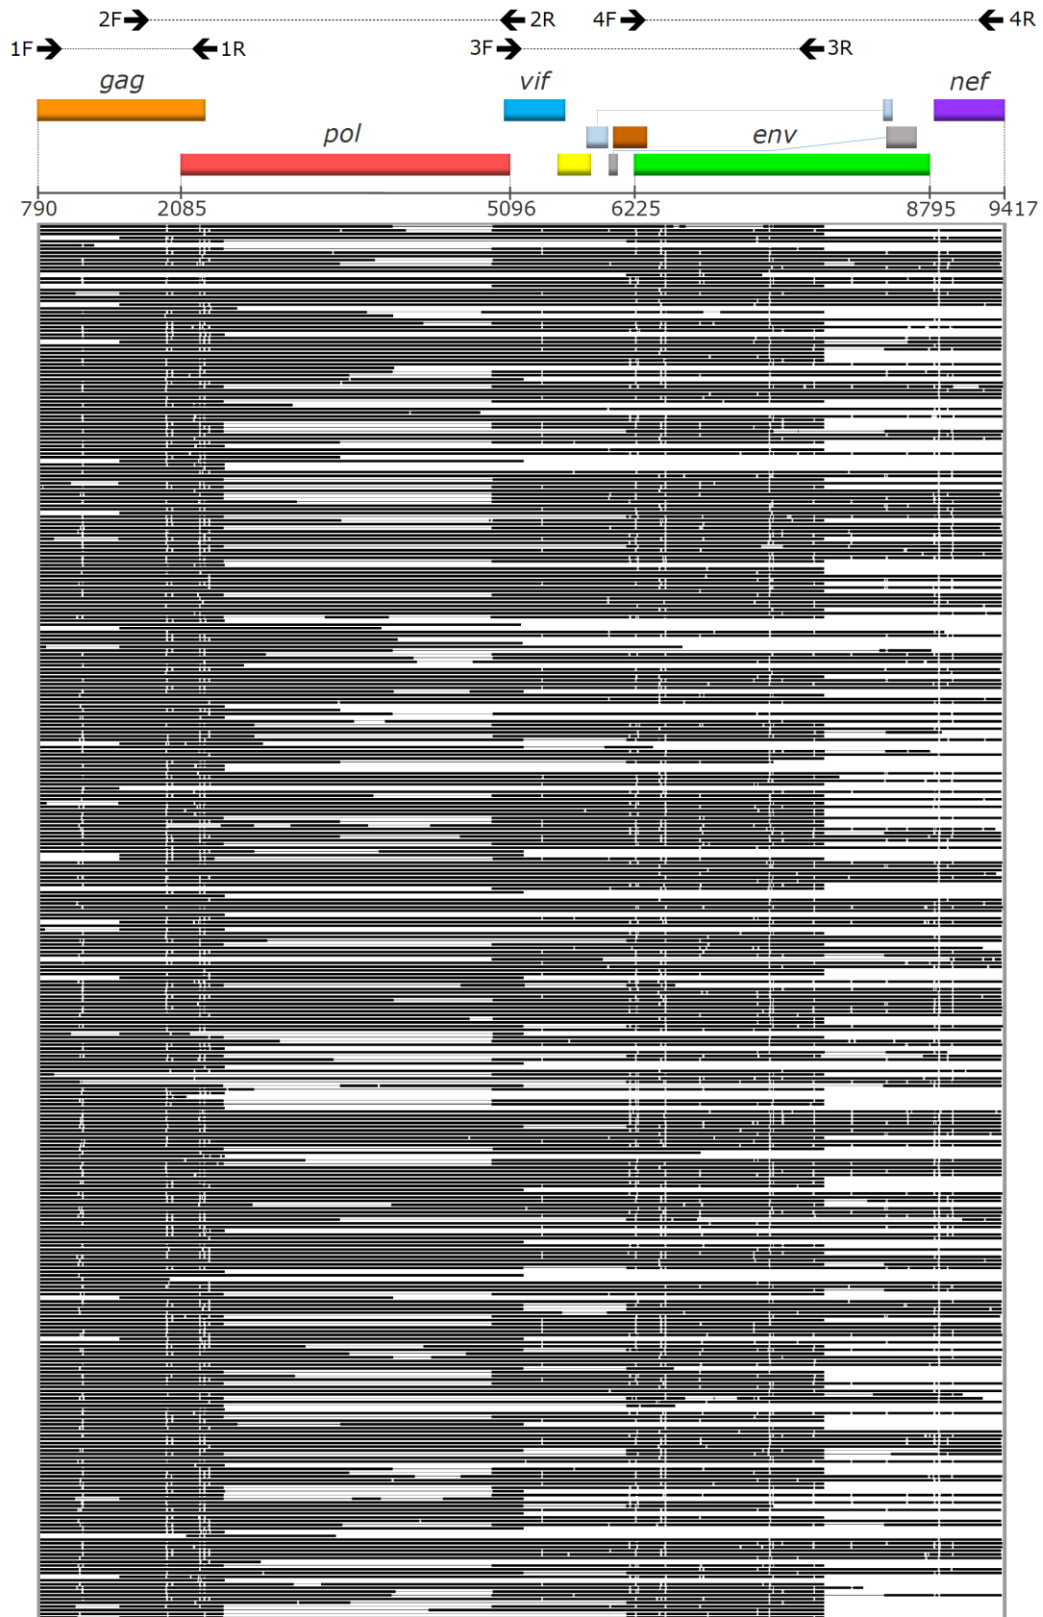

**Fig B.** Scatterplot showing the correlation between HIV-1 viral load and sequence length. The regression line ( $R^2 = 0.05$ ;  $p = 0.0026$ ) is shown in blue.

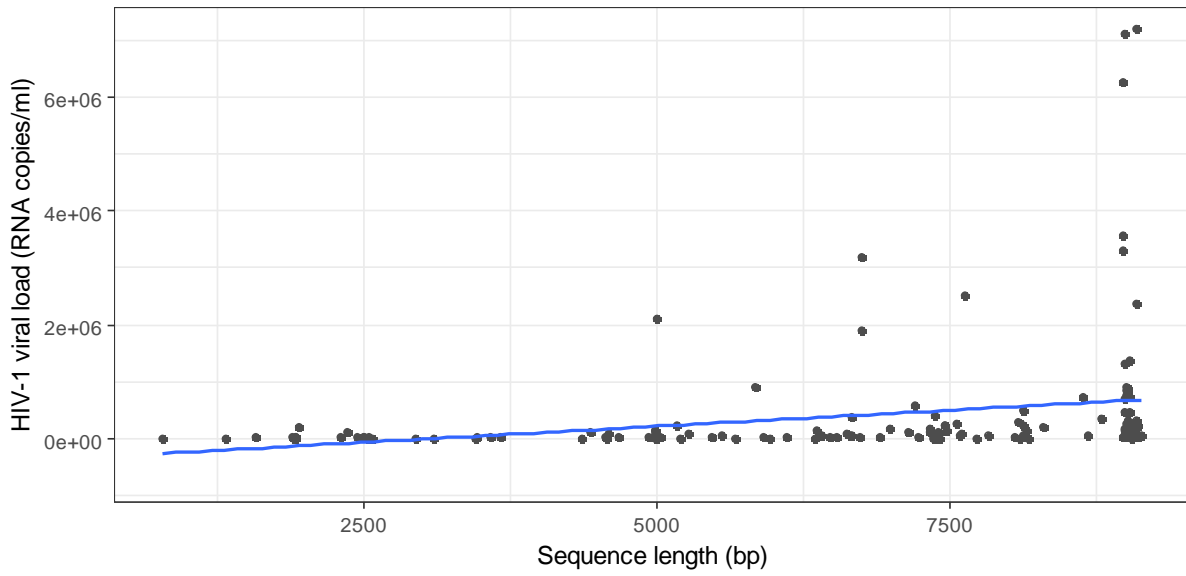

Supporting Information for Yebrá *et al.* 2018 High HIV-1 variability in London, UK

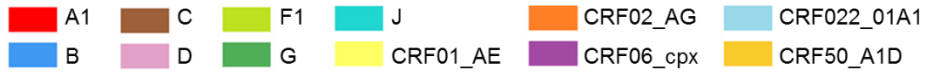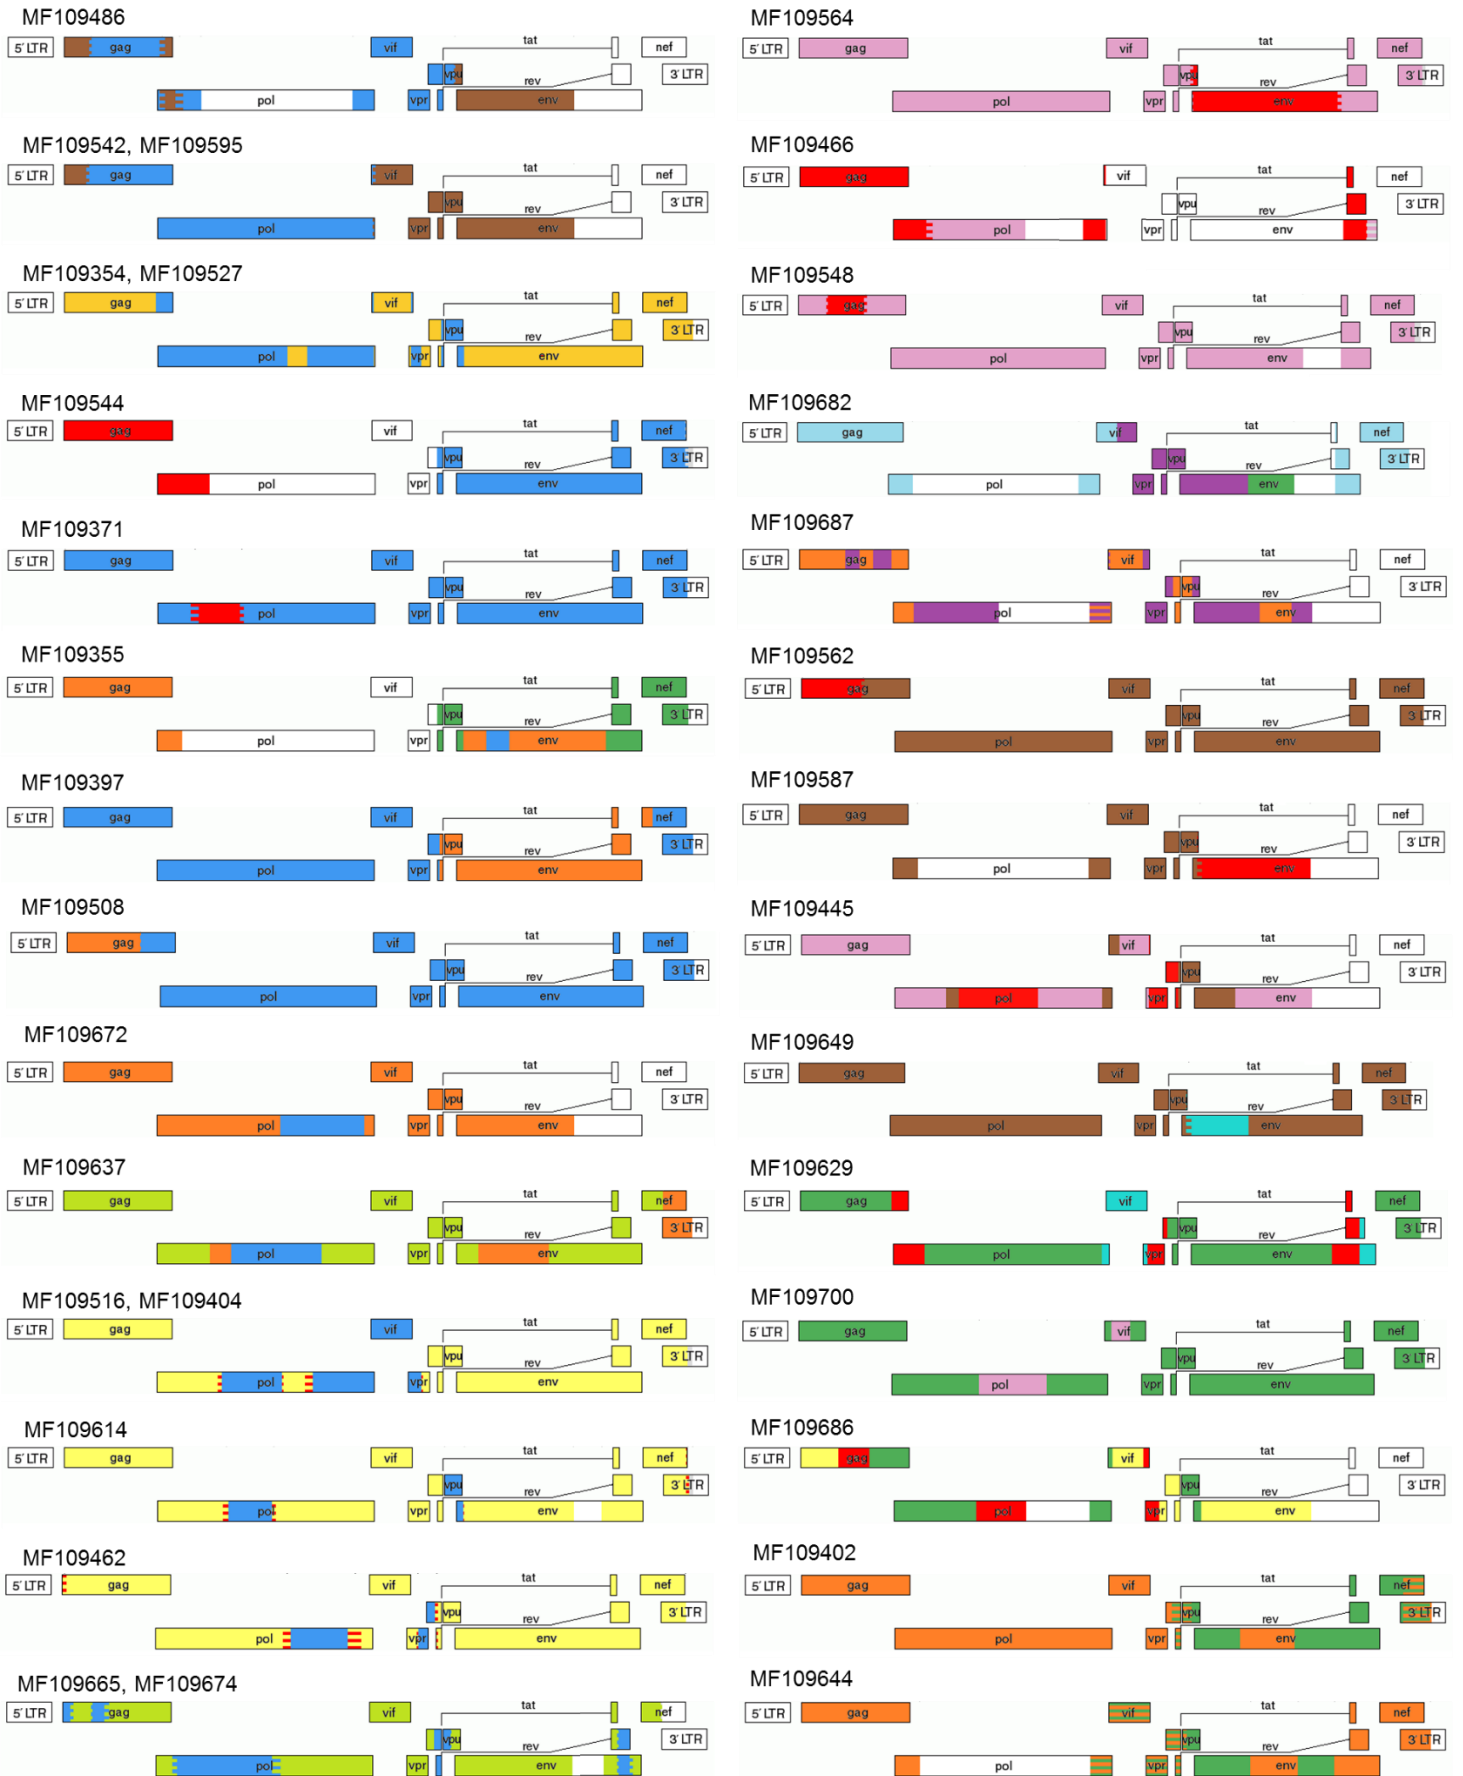

**Fig C (previous page).** Recombination patterns of the 32 unique recombinant forms found in the ICONIC dataset. The colours denote the parental variants involved in the recombination. White colour corresponds to sequence gaps. Note that for URFs pairs that presented the same recombination breakpoints, only one diagram is shown.



**Table A.** Genbank accession number and metadata for the 375 assembled HIV-1 genomes used in this study.

|    | <b>Accession no.</b> | <b>Isolation date</b> | <b>HIV-1 subtype</b> | <b>Length (bp)</b> |
|----|----------------------|-----------------------|----------------------|--------------------|
| 1  | MF109362             | 19/11/2013            | B                    | 5668               |
| 2  | MF109352             | 21/11/2013            | G                    | 8298               |
| 3  | MF109353             | 22/11/2013            | B                    | 7344               |
| 4  | MF109354             | 21/11/2013            | URF (B/CRF50_A1D)    | 8085               |
| 5  | MF109355             | 21/11/2013            | URF (B/G/CRF02_AG)   | 5489               |
| 6  | MF109356             | 14/11/2013            | C                    | 1066               |
| 7  | MF109357             | 20/11/2013            | CRF06_cpx            | 5288               |
| 8  | MF109358             | 20/11/2013            | CRF01_AE             | 8978               |
| 9  | MF109359             | 22/11/2013            | B                    | 9041               |
| 10 | MF109360             | 22/11/2013            | F1                   | 8038               |
| 11 | MF109361             | 22/11/2013            | A1                   | 7416               |
| 12 | MF109363             | 22/11/2013            | B                    | 9044               |
| 13 | MF109364             | 26/11/2013            | B                    | 9054               |
| 14 | MF109365             | 26/11/2013            | CRF19_cpx            | 1262               |
| 15 | MF109366             | 26/11/2013            | C                    | 8998               |
| 16 | MF109367             | 26/11/2013            | C                    | 9049               |
| 17 | MF109368             | 26/11/2013            | B                    | 3089               |
| 18 | MF109369             | 26/11/2013            | B                    | 9008               |
| 19 | MF109370             | 27/11/2013            | CRF01_AE             | 8263               |
| 20 | MF109371             | 27/11/2013            | URF (A1/B)           | 9011               |
| 21 | MF109372             | 27/11/2013            | B                    | 9038               |
| 22 | MF109383             | 19/11/2013            | CRF06_cpx            | 8064               |
| 23 | MF109373             | 25/11/2013            | B                    | 2560               |
| 24 | MF109374             | 04/12/2013            | CRF02_AG             | 6348               |
| 25 | MF109375             | 05/12/2013            | B                    | 3450               |
| 26 | MF109376             | 04/12/2013            | B                    | 9045               |
| 27 | MF109377             | 06/12/2013            | CRF01_AE             | 6757               |
| 28 | MF109378             | 04/12/2013            | CRF18_cpx            | 8944               |
| 29 | MF109379             | 04/12/2013            | C                    | 7320               |
| 30 | MF109380             | 06/12/2013            | CRF02_AG             | 1923               |
| 31 | MF109381             | 06/12/2013            | CRF02_AG             | 9052               |
| 32 | MF109382             | 02/12/2013            | G                    | 7234               |
| 33 | MF109388             | 19/11/2013            | B                    | 9089               |
| 34 | MF109384             | 07/12/2013            | CRF02_AG             | 8546               |
| 35 | MF109385             | 02/12/2013            | B                    | 7357               |
| 36 | MF109386             | 16/12/2013            | B                    | 7425               |
| 37 | MF109387             | 11/12/2013            | C                    | 7357               |
| 38 | MF109389             | 19/11/2013            | C                    | 9022               |
| 39 | MF109390             | 22/11/2013            | B                    | 3825               |
| 40 | MF109391             | 21/11/2013            | A1                   | 8162               |
| 41 | MF109392             | 21/11/2013            | CRF01_AE             | 7788               |

|           | <b>Accession no.</b> | <b>Isolation date</b> | <b>HIV-1 subtype</b> | <b>Length (bp)</b> |
|-----------|----------------------|-----------------------|----------------------|--------------------|
| <b>42</b> | MF109393             | 21/11/2013            | B                    | 4555               |
| <b>43</b> | MF109402             | 03/01/2014            | URF (G/CRF02_AG)     | 9095               |
| <b>44</b> | MF109394             | 14/01/2014            | C                    | 6423               |
| <b>45</b> | MF109395             | 23/01/2014            | B                    | 9038               |
| <b>46</b> | MF109396             | 22/01/2014            | B                    | 9048               |
| <b>47</b> | MF109397             | 03/01/2014            | URF (B/CRF02_AG)     | 9030               |
| <b>48</b> | MF109398             | 22/01/2014            | B                    | 4962               |
| <b>49</b> | MF109399             | 15/01/2014            | C                    | 2517               |
| <b>50</b> | MF109400             | 23/01/2014            | B                    | 9000               |
| <b>51</b> | MF109401             | 22/01/2014            | B                    | 4356               |
| <b>52</b> | MF109413             | 03/01/2014            | C                    | 9013               |
| <b>53</b> | MF109403             | 15/01/2014            | C                    | 7364               |
| <b>54</b> | MF109404             | 23/01/2014            | URF (B/CRF01_AE)     | 4980               |
| <b>55</b> | MF109405             | 25/01/2014            | G                    | 4970               |
| <b>56</b> | MF109406             | 24/01/2014            | CRF02_AG             | 4417               |
| <b>57</b> | MF109407             | 24/01/2014            | CRF01_AE             | 9051               |
| <b>58</b> | MF109408             | 24/01/2014            | B                    | 9007               |
| <b>59</b> | MF109409             | 20/01/2014            | CRF02_AG             | 5957               |
| <b>60</b> | MF109410             | 24/01/2014            | C                    | 1891               |
| <b>61</b> | MF109411             | 25/01/2014            | B                    | 7341               |
| <b>62</b> | MF109412             | 22/01/2014            | C                    | 9079               |
| <b>63</b> | MF109424             | 23/12/2013            | A1                   | 2929               |
| <b>64</b> | MF109414             | 22/01/2014            | C                    | 3580               |
| <b>65</b> | MF109415             | 20/01/2014            | C                    | 1901               |
| <b>66</b> | MF109416             | 28/01/2014            | B                    | 1907               |
| <b>67</b> | MF109417             | 28/01/2014            | CRF13_cpx            | 9099               |
| <b>68</b> | MF109418             | 28/01/2014            | B                    | 9066               |
| <b>69</b> | MF109419             | 20/01/2014            | B                    | 4973               |
| <b>70</b> | MF109420             | 29/01/2014            | B                    | 8289               |
| <b>71</b> | MF109421             | 29/01/2014            | CRF02_AG             | 5031               |
| <b>72</b> | MF109422             | 29/01/2014            | B                    | 9083               |
| <b>73</b> | MF109423             | 29/01/2014            | B                    | 6658               |
| <b>74</b> | MF109430             | 07/01/2014            | B                    | 6905               |
| <b>75</b> | MF109425             | 31/01/2014            | C                    | 7731               |
| <b>76</b> | MF109426             | 29/01/2014            | B                    | 8991               |
| <b>77</b> | MF109427             | 29/01/2014            | A1                   | 9045               |
| <b>78</b> | MF109428             | 29/01/2014            | B                    | 8007               |
| <b>79</b> | MF109429             | 29/01/2014            | C                    | 5790               |
| <b>80</b> | MF109431             | 14/01/2014            | CRF02_AG             | 6091               |
| <b>81</b> | MF109432             | 14/01/2014            | CRF02_AG             | 8923               |
| <b>82</b> | MF109433             | 13/01/2014            | B                    | 6629               |
| <b>83</b> | MF109434             | 29/01/2014            | F1                   | 8988               |
| <b>84</b> | MF109435             | 29/01/2014            | C                    | 9074               |

|            | <b>Accession no.</b> | <b>Isolation date</b> | <b>HIV-1 subtype</b> | <b>Length (bp)</b> |
|------------|----------------------|-----------------------|----------------------|--------------------|
| <b>85</b>  | MF109436             | 29/01/2014            | CRF02_AG             | 6749               |
| <b>86</b>  | MF109437             | 29/01/2014            | C                    | 9051               |
| <b>87</b>  | MF109438             | 29/01/2014            | F1                   | 5200               |
| <b>88</b>  | MF109439             | 29/01/2014            | CRF02_AG             | 8995               |
| <b>89</b>  | MF109440             | 01/02/2014            | B                    | 9056               |
| <b>90</b>  | MF109441             | 01/02/2014            | C                    | 9020               |
| <b>91</b>  | MF109442             | 26/11/2013            | C                    | 4978               |
| <b>92</b>  | MF109443             | 23/01/2014            | C                    | 2175               |
| <b>93</b>  | MF109444             | 06/02/2014            | B                    | 7264               |
| <b>94</b>  | MF109445             | 04/02/2014            | URF (A1/C/D)         | 7327               |
| <b>95</b>  | MF109446             | 05/02/2014            | B                    | 9013               |
| <b>96</b>  | MF109447             | 18/01/2014            | B                    | 9066               |
| <b>97</b>  | MF109448             | 05/02/2014            | CRF02_AG             | 7408               |
| <b>98</b>  | MF109449             | 03/02/2014            | B                    | 8989               |
| <b>99</b>  | MF109450             | 07/02/2014            | B                    | 7349               |
| <b>100</b> | MF109451             | 13/02/2014            | B                    | 6649               |
| <b>101</b> | MF109452             | 12/02/2014            | B                    | 8987               |
| <b>102</b> | MF109453             | 13/02/2014            | B                    | 9043               |
| <b>103</b> | MF109454             | 14/02/2013            | B                    | 9009               |
| <b>104</b> | MF109455             | 14/02/2014            | B                    | 7343               |
| <b>105</b> | MF109456             | 11/02/2014            | B                    | 9024               |
| <b>106</b> | MF109457             | 22/01/2014            | C                    | 5513               |
| <b>107</b> | MF109458             | 14/02/2014            | CRF01_AE             | 1923               |
| <b>108</b> | MF109459             | 14/02/2014            | B                    | 4607               |
| <b>109</b> | MF109460             | 14/02/2014            | B                    | 2513               |
| <b>110</b> | MF109461             | 14/02/2014            | B                    | 8392               |
| <b>111</b> | MF109462             | 13/02/2014            | URF (B/CRF01_AE)     | 9007               |
| <b>112</b> | MF109463             | 14/02/2014            | CRF49_cpx            | 3709               |
| <b>113</b> | MF109464             | 14/02/2014            | B                    | 4885               |
| <b>114</b> | MF109465             | 18/02/2014            | B                    | 5322               |
| <b>115</b> | MF109466             | 28/02/2014            | URF (A1/D)           | 4164               |
| <b>116</b> | MF109467             | 28/02/2014            | C                    | 7120               |
| <b>117</b> | MF109468             | 28/02/2014            | B                    | 8315               |
| <b>118</b> | MF109469             | 26/02/2014            | B                    | 8491               |
| <b>119</b> | MF109470             | 27/02/2014            | C                    | 2087               |
| <b>120</b> | MF109471             | 11/12/2013            | CRF01_AE             | 9064               |
| <b>121</b> | MF109472             | 12/12/2013            | B                    | 9057               |
| <b>122</b> | MF109473             | 12/12/2013            | B                    | 7332               |
| <b>123</b> | MF109474             | 13/12/2013            | CRF06_cpx            | 9023               |
| <b>124</b> | MF109475             | 11/12/2013            | B                    | 8992               |
| <b>125</b> | MF109476             | 11/12/2013            | CRF03_AB             | 9058               |
| <b>126</b> | MF109477             | 13/12/2013            | C                    | 3871               |
| <b>127</b> | MF109478             | 28/11/2013            | B                    | 7419               |

|            | <b>Accession no.</b> | <b>Isolation date</b> | <b>HIV-1 subtype</b> | <b>Length (bp)</b> |
|------------|----------------------|-----------------------|----------------------|--------------------|
| <b>128</b> | MF109479             | 05/12/2013            | B                    | 8994               |
| <b>129</b> | MF109480             | 13/12/2013            | B                    | 9088               |
| <b>130</b> | MF109481             | 12/12/2013            | B                    | 1907               |
| <b>131</b> | MF109482             | 13/12/2013            | CRF02_AG             | 2933               |
| <b>132</b> | MF109483             | 14/12/2013            | B                    | 8089               |
| <b>133</b> | MF109484             | 12/12/2013            | D                    | 1911               |
| <b>134</b> | MF109485             | 17/12/2013            | B                    | 8745               |
| <b>135</b> | MF109486             | 16/12/2013            | URF (B/C)            | 5157               |
| <b>136</b> | MF109487             | 17/12/2013            | B                    | 9010               |
| <b>137</b> | MF109488             | 16/12/2013            | B                    | 7828               |
| <b>138</b> | MF109489             | 17/12/2013            | F1                   | 5460               |
| <b>139</b> | MF109490             | 20/12/2013            | B                    | 8173               |
| <b>140</b> | MF109491             | 10/12/2013            | C                    | 1566               |
| <b>141</b> | MF109492             | 18/12/2013            | B                    | 5000               |
| <b>142</b> | MF109493             | 18/12/2013            | C                    | 7771               |
| <b>143</b> | MF109494             | 18/12/2013            | B                    | 9099               |
| <b>144</b> | MF109495             | 18/12/2013            | B                    | 7353               |
| <b>145</b> | MF109496             | 19/12/2013            | CRF01_AE             | 4568               |
| <b>146</b> | MF109497             | 18/12/2013            | C                    | 1899               |
| <b>147</b> | MF109498             | 17/12/2013            | B                    | 1918               |
| <b>148</b> | MF109499             | 18/12/2013            | B                    | 8926               |
| <b>149</b> | MF109500             | 18/12/2013            | CRF02_AG             | 7583               |
| <b>150</b> | MF109501             | 18/12/2013            | B                    | 8984               |
| <b>151</b> | MF109502             | 20/12/2013            | A1                   | 7374               |
| <b>152</b> | MF109503             | 18/12/2013            | C                    | 1075               |
| <b>153</b> | MF109504             | 31/12/2013            | C                    | 9067               |
| <b>154</b> | MF109505             | 31/12/2013            | CRF01_AE             | 6310               |
| <b>155</b> | MF109506             | 30/12/2013            | B                    | 8987               |
| <b>156</b> | MF109507             | 05/11/2013            | C                    | 6742               |
| <b>157</b> | MF109508             | 31/12/2013            | URF (B/CRF02_AG)     | 9023               |
| <b>158</b> | MF109509             | 31/12/2013            | B                    | 7332               |
| <b>159</b> | MF109510             | 29/12/2013            | C                    | 7353               |
| <b>160</b> | MF109518             | 01/05/2014            | B                    | 6665               |
| <b>161</b> | MF109511             | 02/05/2014            | CRF02_AG             | 5999               |
| <b>162</b> | MF109512             | 02/05/2014            | CRF14_BG             | 6064               |
| <b>163</b> | MF109513             | 01/05/2014            | C                    | 8865               |
| <b>164</b> | MF109514             | 24/04/2014            | C                    | 8491               |
| <b>165</b> | MF109515             | 08/05/2014            | CRF02_AG             | 7949               |
| <b>166</b> | MF109516             | 08/05/2014            | URF (B/CRF01_AE)     | 9024               |
| <b>167</b> | MF109517             | 07/05/2014            | C                    | 5246               |
| <b>168</b> | MF109527             | 25/04/2014            | URF (B/CRF50_AD)     | 8994               |
| <b>169</b> | MF109519             | 06/05/2014            | CRF02_AG             | 3461               |
| <b>170</b> | MF109520             | 21/05/2014            | A1                   | 3818               |

|     | <b>Accession no.</b> | <b>Isolation date</b> | <b>HIV-1 subtype</b> | <b>Length (bp)</b> |
|-----|----------------------|-----------------------|----------------------|--------------------|
| 171 | MF109521             | 27/05/2014            | CRF01_AE             | 3888               |
| 172 | MF109522             | 29/05/2014            | C                    | 9097               |
| 173 | MF109523             | 28/05/2014            | B                    | 9012               |
| 174 | MF109524             | 07/05/2014            | B                    | 9039               |
| 175 | MF109525             | 08/05/2014            | B                    | 8877               |
| 176 | MF109526             | 28/05/2014            | F1                   | 9029               |
| 177 | MF109532             | 24/04/2014            | D                    | 9031               |
| 178 | MF109528             | 29/05/2014            | C                    | 7294               |
| 179 | MF109529             | 03/06/2014            | A1                   | 3061               |
| 180 | MF109530             | 27/05/2014            | A1                   | 4552               |
| 181 | MF109531             | 19/05/2014            | B                    | 1919               |
| 182 | MF109533             | 25/04/2014            | B                    | 9058               |
| 183 | MF109534             | 24/04/2014            | B                    | 9077               |
| 184 | MF109535             | 02/05/2014            | C                    | 9023               |
| 185 | MF109536             | 30/04/2014            | B                    | 9013               |
| 186 | MF109537             | 15/04/2014            | B                    | 1919               |
| 187 | MF109538             | 10/06/2014            | CRF25_cpx            | 9119               |
| 188 | MF109539             | 09/06/2014            | C                    | 8014               |
| 189 | MF109540             | 10/06/2014            | B                    | 8989               |
| 190 | MF109541             | 06/06/2014            | C                    | 1244               |
| 191 | MF109542             | 04/06/2014            | URF (B/C)            | 7394               |
| 192 | MF109543             | 02/06/2014            | B                    | 9040               |
| 193 | MF109544             | 02/06/2014            | URF (A1/B)           | 5826               |
| 194 | MF109545             | 18/06/2014            | B                    | 4970               |
| 195 | MF109546             | 16/06/2014            | B                    | 8729               |
| 196 | MF109547             | 18/06/2014            | CRF02_AG             | 9014               |
| 197 | MF109548             | 19/06/2014            | URF (A1/D)           | 8494               |
| 198 | MF109549             | 20/06/2014            | C                    | 1648               |
| 199 | MF109550             | 19/06/2014            | CRF02_AG             | 9058               |
| 200 | MF109551             | 19/06/2014            | B                    | 9100               |
| 201 | MF109552             | 19/06/2014            | B                    | 7345               |
| 202 | MF109553             | 18/06/2014            | CRF06_cpx            | 7337               |
| 203 | MF109554             | 13/06/2014            | B                    | 3574               |
| 204 | MF109555             | 10/06/2014            | CRF07_BC             | 8979               |
| 205 | MF109556             | 16/06/2014            | CRF02_AG             | 2892               |
| 206 | MF109557             | 17/06/2014            | C                    | 9035               |
| 207 | MF109558             | 05/06/2014            | B                    | 9001               |
| 208 | MF109559             | 17/06/2014            | CRF02_AG             | 9047               |
| 209 | MF109560             | 06/06/2014            | C                    | 8216               |
| 210 | MF109561             | 12/06/2014            | B                    | 8993               |
| 211 | MF109562             | 14/06/2014            | URF (A1/C)           | 8999               |
| 212 | MF109563             | 16/06/2014            | C                    | 9042               |
| 213 | MF109564             | 12/06/2014            | URF (A1/D)           | 9030               |

|            | <b>Accession no.</b> | <b>Isolation date</b> | <b>HIV-1 subtype</b> | <b>Length (bp)</b> |
|------------|----------------------|-----------------------|----------------------|--------------------|
| <b>214</b> | MF109565             | 11/06/2014            | B                    | 7138               |
| <b>215</b> | MF109566             | 11/06/2014            | B                    | 7350               |
| <b>216</b> | MF109567             | 11/06/2014            | C                    | 8101               |
| <b>217</b> | MF109568             | 13/06/2014            | G                    | 9052               |
| <b>218</b> | MF109569             | 12/06/2014            | B                    | 1631               |
| <b>219</b> | MF109570             | 11/06/2014            | B                    | 4957               |
| <b>220</b> | MF109571             | 11/06/2014            | B                    | 7067               |
| <b>221</b> | MF109572             | 13/06/2014            | CRF02_AG             | 9025               |
| <b>222</b> | MF109580             | 19/02/2014            | C                    | 1893               |
| <b>223</b> | MF109573             | 12/03/2014            | B                    | 7905               |
| <b>224</b> | MF109574             | 27/02/2014            | B                    | 4513               |
| <b>225</b> | MF109575             | 14/03/2014            | CRF01_AE             | 7656               |
| <b>226</b> | MF109576             | 14/03/2014            | B                    | 4580               |
| <b>227</b> | MF109577             | 14/03/2014            | B                    | 1939               |
| <b>228</b> | MF109578             | 12/03/2014            | B                    | 9015               |
| <b>229</b> | MF109579             | 27/02/2014            | C                    | 3181               |
| <b>230</b> | MF109590             | 14/02/2014            | B                    | 8941               |
| <b>231</b> | MF109581             | 27/03/2014            | C                    | 3950               |
| <b>232</b> | MF109582             | 27/03/2014            | B                    | 4702               |
| <b>233</b> | MF109583             | 26/03/2014            | C                    | 5102               |
| <b>234</b> | MF109584             | 19/03/2014            | G                    | 1936               |
| <b>235</b> | MF109585             | 27/03/2014            | CRF06_cpx            | 1608               |
| <b>236</b> | MF109586             | 27/03/2014            | C                    | 5034               |
| <b>237</b> | MF109587             | 29/03/2014            | URF (A1/C)           | 4660               |
| <b>238</b> | MF109588             | 29/03/2014            | B                    | 1929               |
| <b>239</b> | MF109589             | 31/03/2014            | C                    | 8867               |
| <b>240</b> | MF109591             | 19/03/2014            | C                    | 9010               |
| <b>241</b> | MF109592             | 12/03/2014            | C                    | 9051               |
| <b>242</b> | MF109593             | 31/10/2013            | C                    | 8987               |
| <b>243</b> | MF109594             | 20/03/2014            | B                    | 8115               |
| <b>244</b> | MF109595             | 20/03/2014            | URF (B/C)            | 9053               |
| <b>245</b> | MF109596             | 20/03/2014            | B                    | 9057               |
| <b>246</b> | MF109597             | 20/03/2014            | B                    | 7339               |
| <b>247</b> | MF109598             | 20/03/2014            | G                    | 9034               |
| <b>248</b> | MF109599             | 19/03/2014            | C                    | 9039               |
| <b>249</b> | MF109600             | 28/02/2014            | B                    | 5014               |
| <b>250</b> | MF109601             | 26/02/2014            | D                    | 7225               |
| <b>251</b> | MF109602             | 05/03/2014            | B                    | 1900               |
| <b>252</b> | MF109603             | 12/03/2014            | B                    | 7267               |
| <b>253</b> | MF109604             | 12/03/2014            | C                    | 6655               |
| <b>254</b> | MF109605             | 20/03/2014            | B                    | 9124               |
| <b>255</b> | MF109606             | 18/03/2014            | C                    | 9080               |
| <b>256</b> | MF109607             | 20/03/2014            | C                    | 9010               |

|            | <b>Accession no.</b> | <b>Isolation date</b> | <b>HIV-1 subtype</b> | <b>Length (bp)</b> |
|------------|----------------------|-----------------------|----------------------|--------------------|
| <b>257</b> | MF109608             | 22/03/2014            | B                    | 7567               |
| <b>258</b> | MF109609             | 01/04/2014            | C                    | 7391               |
| <b>259</b> | MF109610             | 27/03/2014            | CRF06_cpx            | 7361               |
| <b>260</b> | MF109611             | 01/04/2014            | B                    | 4589               |
| <b>261</b> | MF109612             | 02/04/2014            | C                    | 9005               |
| <b>262</b> | MF109613             | 02/04/2014            | A1                   | 9093               |
| <b>263</b> | MF109614             | 03/04/2014            | URF (B/CRF01_AE)     | 8648               |
| <b>264</b> | MF109615             | 03/04/2014            | B                    | 6179               |
| <b>265</b> | MF109616             | 02/04/2014            | B                    | 8989               |
| <b>266</b> | MF109617             | 27/03/2014            | C                    | 9042               |
| <b>267</b> | MF109618             | 08/04/2014            | CRF01_AE             | 8990               |
| <b>268</b> | MF109619             | 07/04/2014            | A1                   | 3910               |
| <b>269</b> | MF109620             | 07/04/2014            | B                    | 9047               |
| <b>270</b> | MF109621             | 07/04/2014            | CRF01_AE             | 9015               |
| <b>271</b> | MF109622             | 07/04/2014            | CRF06_cpx            | 1922               |
| <b>272</b> | MF109623             | 02/04/2014            | A1                   | 9072               |
| <b>273</b> | MF109624             | 08/04/2014            | B                    | 9068               |
| <b>274</b> | MF109625             | 09/04/2014            | B                    | 4584               |
| <b>275</b> | MF109626             | 09/04/2014            | C                    | 7407               |
| <b>276</b> | MF109627             | 11/04/2014            | B                    | 8970               |
| <b>277</b> | MF109628             | 10/04/2014            | G                    | 7369               |
| <b>278</b> | MF109629             | 10/04/2014            | URF (A1/G/J)         | 9167               |
| <b>279</b> | MF109630             | 03/04/2014            | B                    | 9040               |
| <b>280</b> | MF109631             | 17/03/2014            | B                    | 8556               |
| <b>281</b> | MF109632             | 31/01/2014            | A1                   | 8165               |
| <b>282</b> | MF109633             | 13/02/2014            | B                    | 1930               |
| <b>283</b> | MF109634             | 02/04/2014            | B                    | 4581               |
| <b>284</b> | MF109635             | 11/04/2014            | B                    | 1435               |
| <b>285</b> | MF109636             | 10/04/2014            | B                    | 8994               |
| <b>286</b> | MF109637             | 14/04/2014            | URF (B/F1/CRF02_AG)  | 9024               |
| <b>287</b> | MF109638             | 01/05/2014            | B                    | 8506               |
| <b>288</b> | MF109639             | 30/04/2014            | B                    | 4986               |
| <b>289</b> | MF109650             | 06/11/2013            | B                    | 2443               |
| <b>290</b> | MF109640             | 28/10/2013            | F1                   | 9015               |
| <b>291</b> | MF109641             | 29/10/2013            | CRF02_AG             | 8117               |
| <b>292</b> | MF109642             | 28/10/2013            | B                    | 8120               |
| <b>293</b> | MF109643             | 30/10/2013            | B                    | 8640               |
| <b>294</b> | MF109644             | 30/10/2013            | URF (G/CRF02_AG)     | 6640               |
| <b>295</b> | MF109645             | 29/10/2013            | A1                   | 7358               |
| <b>296</b> | MF109646             | 30/10/2013            | G                    | 6732               |
| <b>297</b> | MF109647             | 30/10/2013            | G                    | 9130               |
| <b>298</b> | MF109648             | 25/10/2013            | CRF43_02G            | 9085               |
| <b>299</b> | MF109649             | 30/10/2013            | URF (C/J)            | 9038               |

|            | <b>Accession no.</b> | <b>Isolation date</b> | <b>HIV-1 subtype</b>       | <b>Length (bp)</b> |
|------------|----------------------|-----------------------|----------------------------|--------------------|
| <b>300</b> | MF109661             | 11/11/2013            | F1                         | 3577               |
| <b>301</b> | MF109651             | 31/10/2013            | CRF06_cpx                  | 9088               |
| <b>302</b> | MF109652             | 21/10/2013            | CRF02_AG                   | 6532               |
| <b>303</b> | MF109653             | 01/11/2013            | C                          | 8049               |
| <b>304</b> | MF109654             | 01/11/2013            | CRF09_cpx                  | 6403               |
| <b>305</b> | MF109655             | 04/11/2013            | B                          | 8679               |
| <b>306</b> | MF109656             | 04/11/2013            | B                          | 9050               |
| <b>307</b> | MF109657             | 04/11/2013            | CRF02_AG                   | 9033               |
| <b>308</b> | MF109658             | 15/10/2013            | D                          | 4989               |
| <b>309</b> | MF109659             | 31/10/2013            | B                          | 4985               |
| <b>310</b> | MF109660             | 31/10/2013            | C                          | 5547               |
| <b>311</b> | MF109672             | 11/11/2013            | URF (B/CRF02_AG)           | 7403               |
| <b>312</b> | MF109662             | 05/11/2013            | C                          | 6660               |
| <b>313</b> | MF109663             | 05/11/2013            | B                          | 7331               |
| <b>314</b> | MF109664             | 07/11/2013            | B                          | 9103               |
| <b>315</b> | MF109665             | 07/11/2013            | URF (B/F1)                 | 8153               |
| <b>316</b> | MF109666             | 07/11/2013            | B                          | 4665               |
| <b>317</b> | MF109667             | 25/10/2013            | B                          | 9016               |
| <b>318</b> | MF109668             | 07/11/2013            | B                          | 2348               |
| <b>319</b> | MF109669             | 06/11/2013            | C                          | 1906               |
| <b>320</b> | MF109670             | 07/11/2013            | C                          | 9025               |
| <b>321</b> | MF109671             | 08/11/2013            | URF (G/CRF01_AE/CRF06_cpx) | 5032               |
| <b>322</b> | MF109678             | 19/11/2013            | CRF01_AE                   | 7357               |
| <b>323</b> | MF109673             | 23/11/2013            | C                          | 3654               |
| <b>324</b> | MF109674             | 11/11/2013            | URF (B/F1)                 | 7455               |
| <b>325</b> | MF109675             | 01/11/2013            | B                          | 9052               |
| <b>326</b> | MF109676             | 13/11/2013            | C                          | 9016               |
| <b>327</b> | MF109677             | 12/11/2013            | A1                         | 8982               |
| <b>328</b> | MF109679             | 24/10/2013            | A1                         | 8982               |
| <b>329</b> | MF109680             | 25/10/2013            | B                          | 9001               |
| <b>330</b> | MF109681             | 25/10/2013            | C                          | 7149               |
| <b>331</b> | MF109682             | 24/10/2013            | URF (06_cpx/22_01A1)       | 4926               |
| <b>332</b> | MF109683             | 13/11/2013            | B                          | 7349               |
| <b>333</b> | MF109684             | 13/11/2013            | C                          | 8993               |
| <b>334</b> | MF109685             | 13/11/2013            | B                          | 1934               |
| <b>335</b> | MF109686             | 13/11/2013            | URF (A1/G/CRF01_AE)        | 6477               |
| <b>336</b> | MF109687             | 05/11/2013            | URF (02_AG/CRF06_cpx)      | 6102               |
| <b>337</b> | MF109688             | 04/11/2013            | CRF02_AG                   | 8787               |
| <b>338</b> | MF109689             | 12/11/2013            | D                          | 8995               |
| <b>339</b> | MF109690             | 15/11/2013            | CRF02_AG                   | 7377               |
| <b>340</b> | MF109691             | 15/11/2013            | C                          | 4993               |
| <b>341</b> | MF109692             | 13/11/2013            | A1                         | 2291               |
| <b>342</b> | MF109693             | 04/09/2013            | C                          | 6616               |



|            | <b>Accession no.</b> | <b>Isolation date</b> | <b>HIV-1 subtype</b> | <b>Length (bp)</b> |
|------------|----------------------|-----------------------|----------------------|--------------------|
| <b>343</b> | MF109694             | 05/09/2013            | B                    | 2501               |
| <b>344</b> | MF109695             | 19/11/2013            | C                    | 9046               |
| <b>345</b> | MF109696             | 20/11/2013            | C                    | 5831               |
| <b>346</b> | MF109697             | 22/11/2013            | A1                   | 9013               |
| <b>347</b> | MF109698             | 22/11/2013            | B                    | 4578               |
| <b>348</b> | MF109699             | 04/12/2013            | CRF01_AE             | 7472               |
| <b>349</b> | MF109700             | 22/11/2013            | URF (D/G)            | 9076               |
| <b>350</b> | MF109701             | 18/11/2013            | CRF02_AG             | 7206               |
| <b>351</b> | MF109702             | 20/11/2013            | CRF02_AG             | 4558               |
| <b>352</b> | MF109703             | 18/11/2013            | CRF02_AG             | 1884               |
| <b>353</b> | MF109704             | 04/10/2013            | G                    | 1315               |
| <b>354</b> | MF109705             | 18/11/2013            | B                    | 9076               |
| <b>355</b> | MF109706             | 22/11/2013            | C                    | 9040               |
| <b>356</b> | MF109707             | 21/11/2013            | C                    | 8998               |
| <b>357</b> | MF109708             | 23/11/2013            | CRF02_AG             | 8972               |
| <b>358</b> | MF109709             | 13/11/2013            | CRF02_AG             | 9051               |
| <b>359</b> | MF109710             | 10/10/2013            | D                    | 8973               |
| <b>360</b> | MF109711             | 29/11/2013            | B                    | 2537               |
| <b>361</b> | MF109712             | 22/11/2013            | C                    | 5171               |
| <b>362</b> | MF109713             | 20/11/2013            | D                    | 9083               |
| <b>363</b> | MF109714             | 16/10/2013            | B                    | 8130               |
| <b>364</b> | MF109715             | 19/11/2013            | C                    | 6366               |
| <b>365</b> | MF109716             | 21/11/2013            | B                    | 2493               |
| <b>366</b> | MF109717             | 21/11/2013            | A1                   | 7458               |
| <b>367</b> | MF109718             | 26/11/2013            | CRF60_BC             | 7622               |
| <b>368</b> | MF109719             | 26/11/2013            | C                    | 6980               |
| <b>369</b> | MF109720             | 29/11/2013            | B                    | 7555               |
| <b>370</b> | MF109721             | 31/10/2013            | CRF02_AG             | 7597               |
| <b>371</b> | MF109722             | 05/12/2013            | B                    | 5273               |
| <b>372</b> | MF109723             | 22/11/2013            | B                    | 4982               |
| <b>373</b> | MF109724             | 11/12/2013            | B                    | 5909               |
| <b>374</b> | MF109725             | 07/06/2012            | B                    | 4434               |
| <b>375</b> | MF109726             | 12/12/2013            | B                    | 3458               |

**Table B.** Characteristics of the 17 HIV-1 phylogenetic clusters that were consistently found across the *gag*, *pol* and *env* gene trees.

| Cluster no. | HIV-1 subtype | No. of sequences | Patristic genetic distance (%) |            |            |            | Bootstrap support (%) |            |            |            |
|-------------|---------------|------------------|--------------------------------|------------|------------|------------|-----------------------|------------|------------|------------|
|             |               |                  | Genome                         | <i>gag</i> | <i>pol</i> | <i>env</i> | Genome                | <i>gag</i> | <i>pol</i> | <i>env</i> |
| 1           | B             | 2                | 2.74                           | 2.00       | 1.46       | 4.11       | 100                   | 98         | 100        | 100        |
| 2           | B             | 2                | 0.60                           | 1.13       | 0.53       | 0.53       | 100                   | 100        | 100        | 100        |
| 3           | B             | 2                | 4.02                           | 2.93       | 2.13       | 6.41       | 100                   | 100        | 98         | 100        |
| 4           | B             | 2                | 0.61                           | 0.53       | 0.40       | 0.95       | 100                   | 99         | 100        | 100        |
| 5           | B             | 2                | 2.91                           | 3.59       | 2.23       | 3.78       | 100                   | 100        | 99         | 100        |
| 6           | C             | 2                | 1.01                           | 0.86       | 0.37       | 1.40       | 100                   | 100        | 100        | 100        |
| 7           | C             | 2                | 2.82                           | 1.93       | 1.86       | 4.97       | 100                   | 100        | 100        | 100        |
| 8           | C             | 2                | 0.16                           | 0.07       | 0.17       | 0.45       | 100                   | 100        | 100        | 100        |
| 9           | 01_AE         | 2                | 0.72                           | 0.33       | 0.33       | 0.78       | 100                   | 100        | 100        | 100        |
| 10          | 02_AG         | 2                | 0.08                           | 0.00       | 0.03       | 0.21       | 100                   | 100        | 100        | 100        |
| 11          | 02_AG         | 3                | 0.11                           | 0.07       | 0.10       | 0.12       | 100                   | 100        | 99         | 100        |
| 12          | 02_AG         | 3                | 4.06                           | 3.06       | 2.86       | 5.55       | 100                   | 100        | 100        | 100        |
| 13          | 06_cpx        | 3                | 5.27                           | 5.19       | 2.96       | 8.92       | 100                   | 100        | 100        | 100        |
| 14          | URF_01B       | 2                | 1.10                           | 1.33       | 0.20       | 2.06       | 100                   | 100        | 100        | 100        |
| 15          | URF_50B       | 2                | 3.35                           | 1.53       | 2.53       | 5.47       | 100                   | 100        | 100        | 100        |
| 16          | URF_BC        | 2                | 2.34                           | 2.93       | 2.13       | 3.04       | 100                   | 100        | 100        | 100        |
| 17          | URF_BF1       | 2                | 3.11                           | 2.33       | 2.36       | 3.16       | 100                   | 100        | 100        | 100        |
